# Supplementary material for: Transcriptional Responses of Chilean Quinoa (Chenopodium quinoa Willd.) Under Water Deficit Conditions Uncovers ABA-Independent Expression Patterns
Source: PubMed Central journal article supplement (PMC5340777; doi:10.3389/fpls.2017.00216), 2017-03-08

**Figure S1: Distribution of contigs size obtained from the genome reference (hybrid assembly).**

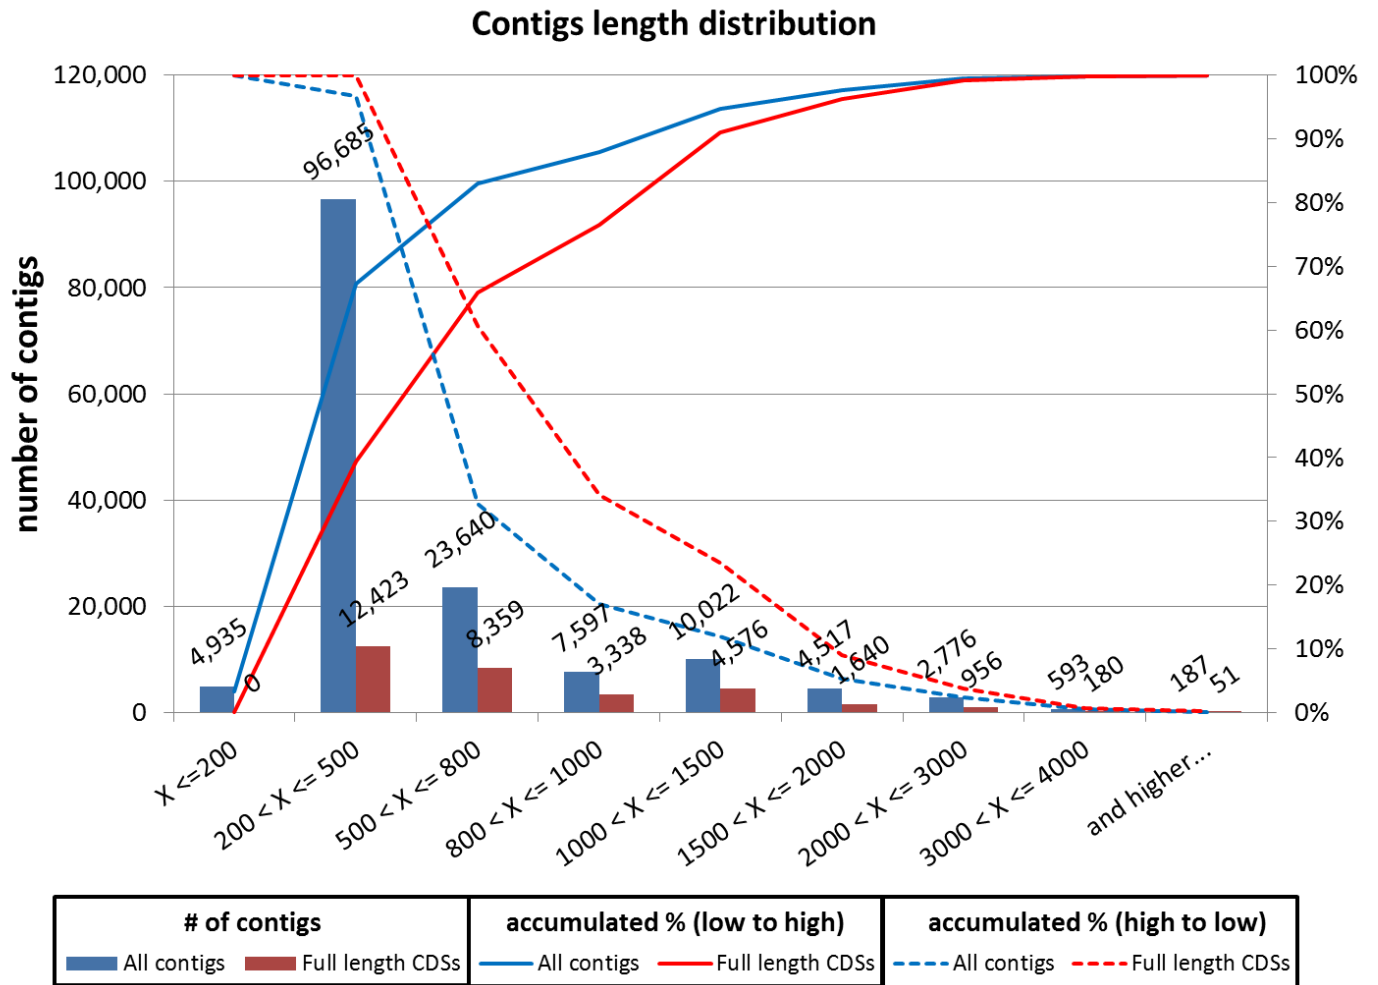

Supplement: Image1.pdf [file Image1.pdf]
